# Supplementary material for: Effect of Hydrothermal Aging on Damping Properties in Sisal Mat-Reinforced Polyester Composites
Source: MDPI journal article supplement (doi:10.3390/polym16020166), 2024-01-05
Supplement: s1 [file s1]

## Article

# Effect of Hydrothermal Aging on Damping Properties in Sisal Mat-Reinforced Polyester Composites

Moisés Silva <sup>1,2,\*</sup>, Beatriz Silva <sup>1</sup>, Adrielle Marques <sup>1</sup>, Silvana Mattedi <sup>3,\*</sup>, Ricardo Carvalho <sup>1</sup>

<sup>1</sup> Construction and Structures Department –Federal University of Bahia, Salvador, BA, Brazil; ricardoc@ufba.br

<sup>2</sup> SENAI Institute of Technology in Civil Construction, SENAI CIMATEC, Salvador, 41650010, BA, Brazil; moises.silva@fieb.org.br

<sup>3</sup> Chemical Engineering Graduate Program –Federal University of Bahia, Salvador, BA, Brazil; silvana@ufba.br

\* Correspondence: RC.: ricardoc@ufba.br, SM: silvana@ufba.br; Tel.: 557142839813,

## Supplementary Material

Tables S1 to S3 show sisal fibers physical, mechanical and chemical properties from literature

**Table S1.** Physical properties of sisal fibers. Adapted from: (Peças et. al.,[1])

| Physical Properties          | Value |
|------------------------------|-------|
| Density (g/cm <sup>3</sup> ) | 1.36  |
| Diameter (µm)                | 7-47  |
| Moisture Content (%)         | 11    |

**Table S2.** Mechanical properties of sisal fibers. (Peças et al., [1])

| Mechanical Properties   | Value   |
|-------------------------|---------|
| Tensile (MPa)           | 577-855 |
| Young's Modulus (GPa)   | 9-22    |
| Elongation at Break (%) | 1.9-3   |

**Table S3.** Chemical Properties of sisal fibers. (Gurunathan et al., [2])

| Chemical Properties         | Value |
|-----------------------------|-------|
| Cellulose (wt%)             | 67-78 |
| Hemicellulose (wt%)         | 10-14 |
| Lignin (wt%)                | 8-11  |
| Pectin (wt%)                | 10    |
| Water soluble (wt%)         | 1.3   |
| Wax (wt%)                   | 2     |
| Microfibrillar angle (deg.) | 10-22 |

## References

1. Peças, P., H. Carvalho, H. Salman, and M. Leite. (2018). "Natural Fibre Composites and Their Applications: A Review." *Journal of Composites Science* 2 (4): 66. doi:10.3390/jcs2040066.
2. Gurunathan T., S. Mohanty, S. K. Nayak, (2015) "A review of the recent developments in biocomposites based on natural fibres and their application perspectives". *Composites Part A: Applied Science and Manufacturing*, 77, 1-25,doi:10.1016/j.compositesa.2015.06.007.

**Disclaimer/Publisher's Note:** The statements, opinions and data contained in all publications are solely those of the individual author(s) and contributor(s) and not of MDPI and/or the editor(s). MDPI and/or the editor(s) disclaim responsibility for any injury to people or property resulting from any ideas, methods, instructions or products referred to in the content.
